# Supplementary material for: The Role of Sirtuin 1 in Palmitic Acid-Induced Endoplasmic Reticulum Stress in Cardiac Myoblasts
Source: MDPI journal article supplement (doi:10.3390/life12020182), 2022-01-26
Supplement: s1 [file s1]

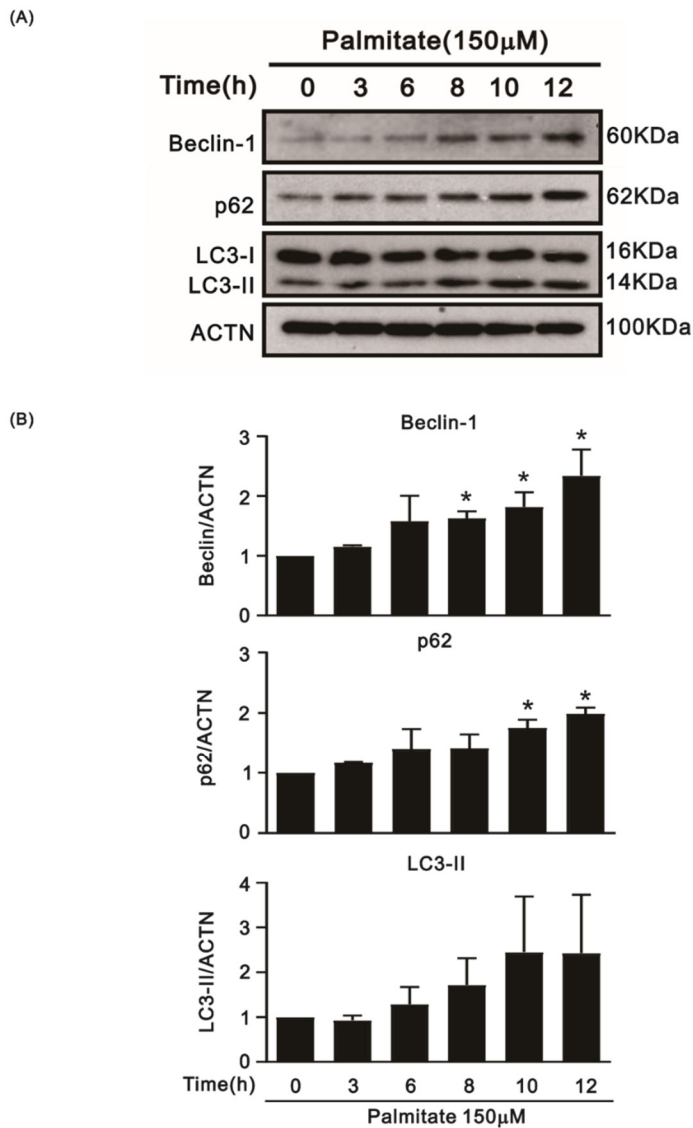

**Figure S1.** Protein levels of autophagy-related proteins in the H9c2 cells treated with PA.

(A) A representative immunoblot of LC3B, beclin 1, and p62 in the H9c2 cells treated with PA. (B) Autophagy-related proteins beclin 1 and p62 in H9c2 cells were upregulated by the PA treatment (n = 3; \*compared to the 0 h group; \* $p < 0.05$ ).
